# Supplementary material for: One pot synthesis and characterization of binary and ternary metal organic frameworks (MOFs) as tri-modal catalysts for thiophene electrooxidation, water splitting and 4-nitrophenol reduction
Source: Royal Society of Chemistry journal article supplement (doi:10.1039/d3nj00347g), 2023-01-01
Supplement: d3nj00347g1.pdf [file d3nj00347g1.pdf]

# **One pot synthesis and characterization of binary and ternary metal organic frameworks (MOFs) as tri-modal catalysts for thiophene electrooxidation, water splitting and 4-nitrophenol reduction**

Mahendran Manivannan,<sup>a,b</sup> Venkatachalam Rajagopal,<sup>a,b,d</sup> Lalithambigai Krishnamoorthy,<sup>c</sup> Dhanasurya Selvam<sup>e</sup>, Vembu Suryanarayanan,<sup>a,b\*</sup> Murugavel Kathiresan <sup>a,b</sup>, Thasan Raju,<sup>a,b</sup> Lathe A. Jones,<sup>d</sup>

<sup>a</sup>Electro Organic & Materials Electrochemistry Division, CSIR-Central Electrochemical Research Institute, Karaikudi-630003, Tamil Nadu, India E-mail: [vidhyasur@yahoo.co.in](mailto:vidhyasur@yahoo.co.in)

<sup>b</sup>Academy of Scientific and Innovative Research (AcSIR), Ghaziabad-201002, India.

<sup>c</sup>Department of Electronics and Communication Engineering PSG College of Technology Coimbatore – 641 004, Tamil Nadu, India.

<sup>d</sup>Centre for Advanced Materials and Industrial Chemistry (CAMIC), School of Science, STEM College, RMIT University, GPO Box 2476, Melbourne, Victoria 3001, Australia.

<sup>e</sup>Centre for Education (CFE), CSIR—Central Electrochemical Research Institute (CECRI), Karaikudi 630003, Tamil Nadu, India.

Corresponding author e-mail id : [vidhyasur@yahoo.co.in](mailto:vidhyasur@yahoo.co.in), [surya@cecri.res.in](mailto:surya@cecri.res.in)

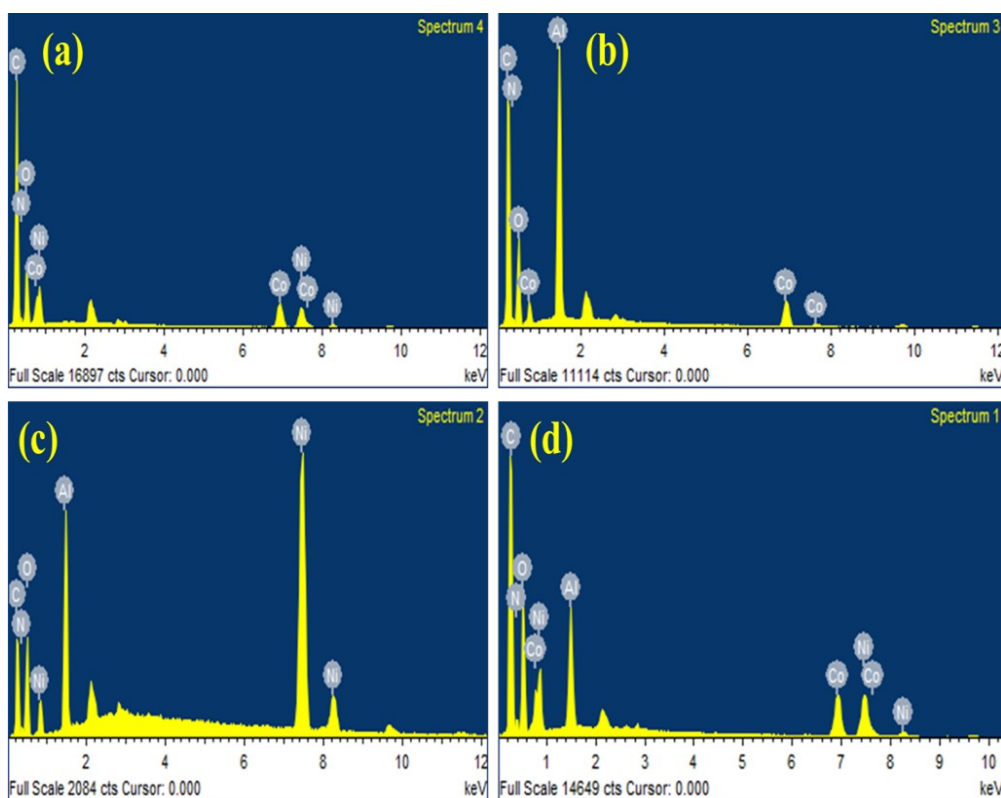

**Figure S1.** EDAX images of a) Co-Ni-MOF, b) Co-Al-MOF c) Ni-Al-MOF, and d)Co-Al-Ni-MOF.

**Table S1.** EDAX analysis of the synthesized composite weight percentage

| S.No. | Catalyst     | Element weight (%) |      |       |       |      |       |
|-------|--------------|--------------------|------|-------|-------|------|-------|
|       |              | Al                 | Co   | Ni    | C     | N    | O     |
| 1     | Co-Ni-MOF    | -                  | 7.71 | 7.22  | 53.59 | 9.20 | 22.29 |
| 2     | Co-Al-MOF    | 10.49              | 6.22 | -     | 51.85 | 7.15 | 24.30 |
| 3     | Ni-Al-MOF    | 8.70               | -    | 49.57 | 25.92 | 3.72 | 12.09 |
| 4     | Co-Al-Ni-MOF | 3.94               | 7.41 | 8.61  | 44.66 | 8.83 | 26.54 |

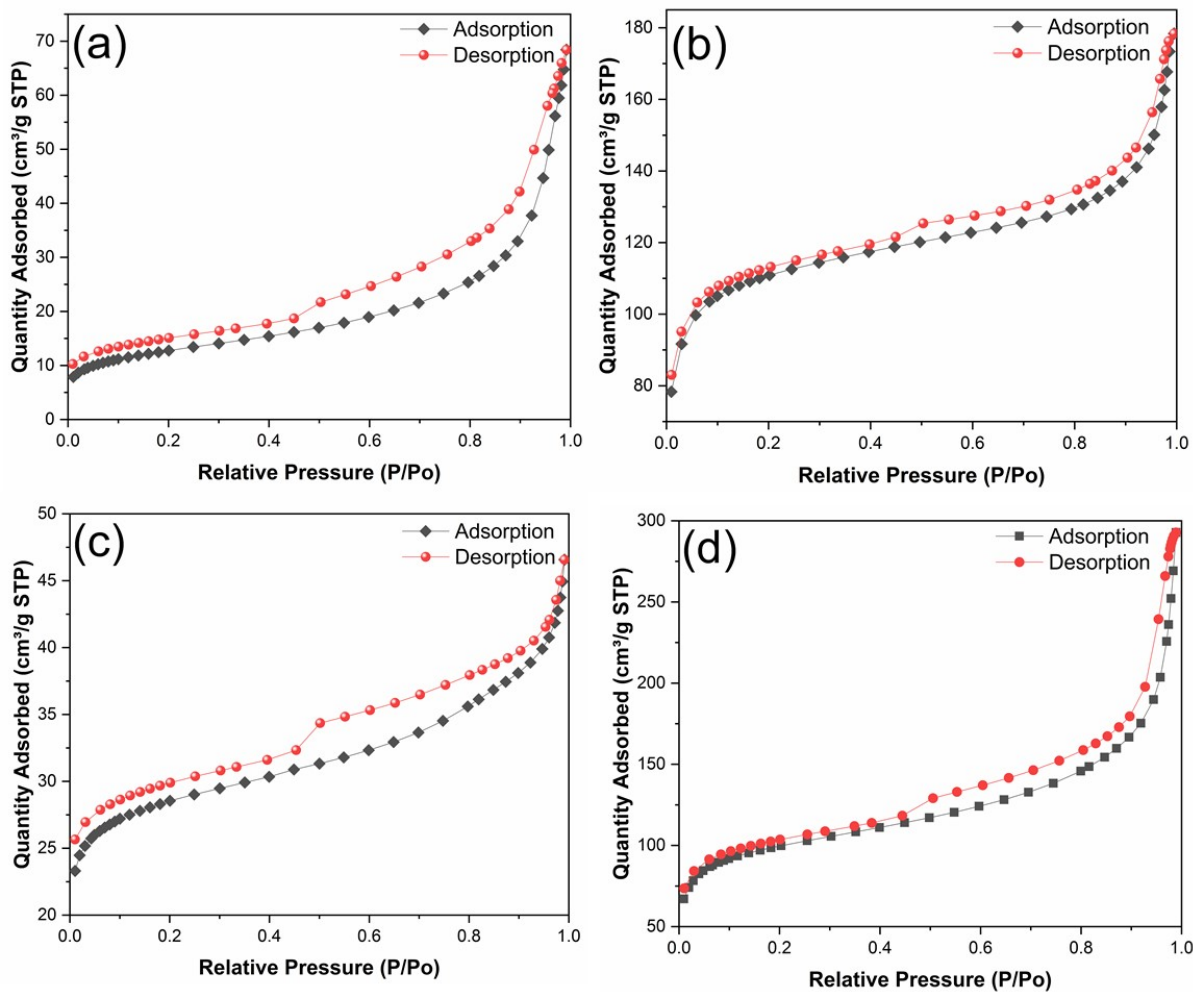

**Figure S2.** BET results of a) Ni-Al-MOF, b) Co-Al-MOF, c) Co-Ni-MOF and d) Co-Al-Ni-MOF.

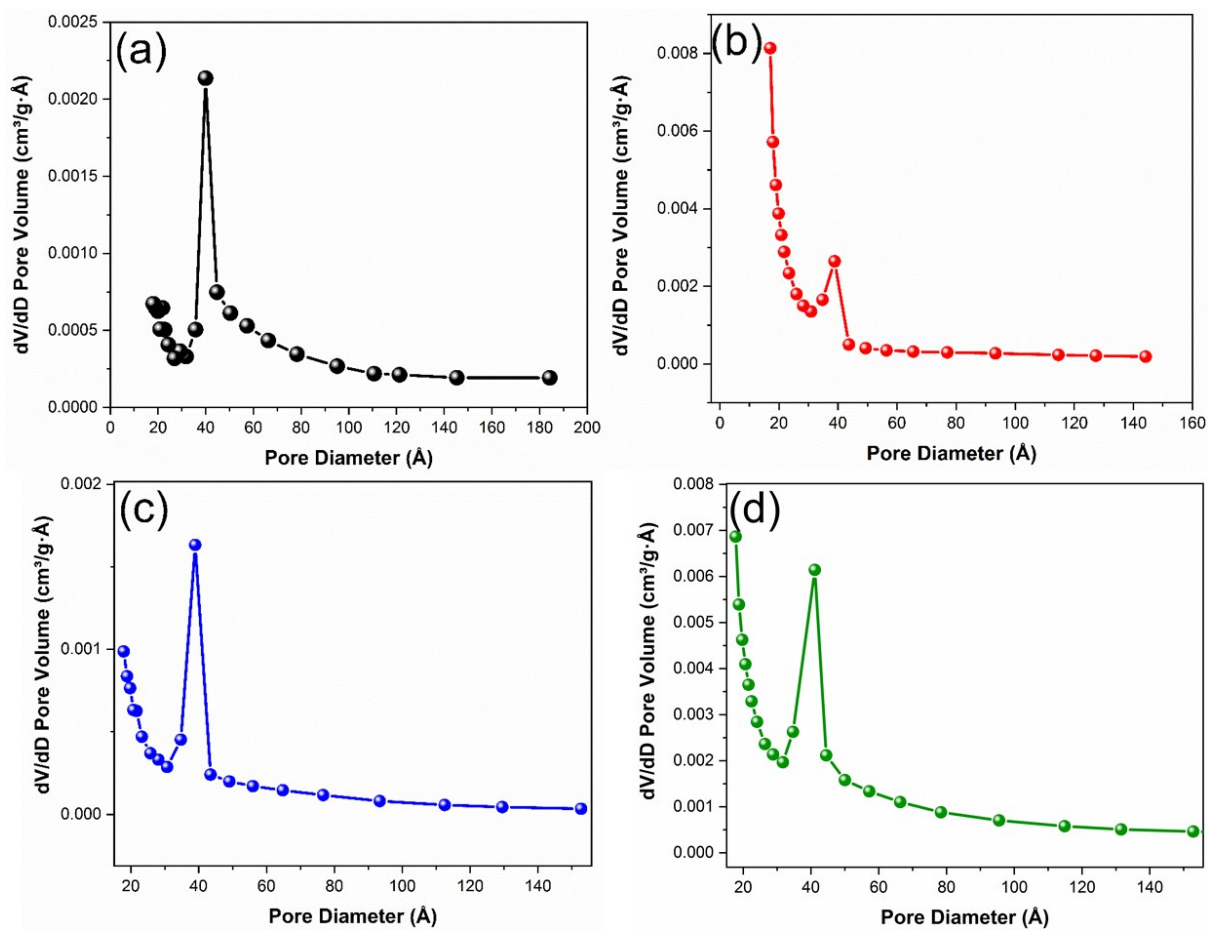

**Figure S3.** BET pore size distribution plot of a) Ni-Al-MOF, b) Co-Al-MOF, c) Co-Ni-MOF and d) Co-Al-Ni-MOF.

**Table S2.** BET surface area ( $\text{m}^2 \text{g}^{-1}$ ), pore volume ( $\text{cm}^3 \text{g}^{-1}$ ) and mean pore diameter ( $\text{\AA}$ ) of Ni-Al-MOF, Co-Al-MOF, Co-Ni-MOF and Co-Al-Ni-MOF obtained using the  $\text{N}_2$  absorption-desorption isotherms.

| S.No. | Catalyst     | BET surface area ( $\text{m}^2 \text{g}^{-1}$ ) | pore volume ( $\text{cm}^3 \text{g}^{-1}$ ) | mean pore diameter ( $\text{\AA}$ ) |
|-------|--------------|-------------------------------------------------|---------------------------------------------|-------------------------------------|
| 1     | Ni-Al-MOF    | 7.8144                                          | 0.1058                                      | 40                                  |
| 2     | Co-Al-MOF    | 19.8026                                         | 0.2758                                      | 38.77                               |
| 3     | Co-Ni-MOF    | 6.0303                                          | 0.0720                                      | 39.26                               |
| 4     | Co-Al-Ni-MOF | 38.777                                          | 0.4528                                      | 41.58                               |

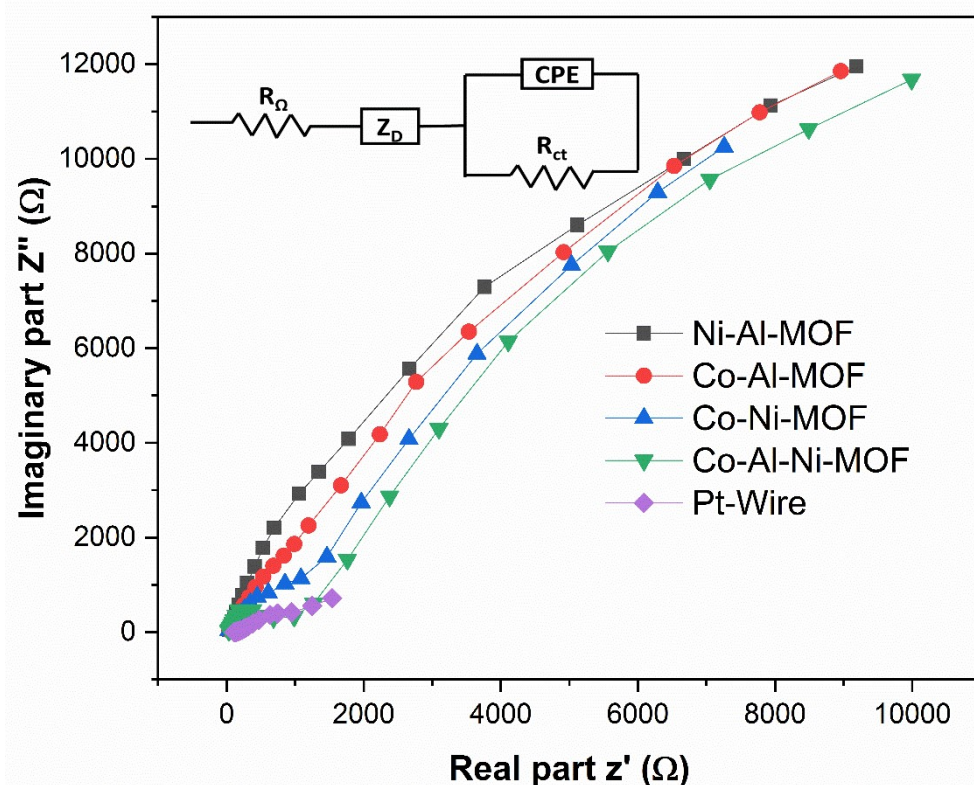

**Figure S4.** Impedance curves for synthesized MOFs for electrooxidation of thiophene

**Table S3** Summary of comparative performance of Ni and Co based MOF catalysts recently reported for water splitting along with the present one.

| No. | Catalyst                                                | Electrolyte                          | Overpotential [mV] | Tafel slope [mV dec <sup>-1</sup> ] | References |
|-----|---------------------------------------------------------|--------------------------------------|--------------------|-------------------------------------|------------|
| 1   | Ni-MOF                                                  | 0.1 M KOH                            | 296                | 45                                  | 1          |
| 2   | Ni-BTC                                                  | 0.1 M KOH                            | 330                | 63                                  | 2          |
| 3   | Ni-MOF-74                                               | 1.0 M KOH                            | 313                | 134.1                               | 3          |
| 4   | Ni-MOF                                                  | 1.0 M KOH                            | 268                | 132.5                               | 4          |
| 5   | 3D NibpyfcdHp                                           | 0.5 M H <sub>2</sub> SO <sub>4</sub> | 350                | 60                                  | 5          |
| 6   | 3D CobpyfcdHp                                           | 0.5 M H <sub>2</sub> SO <sub>4</sub> | 400                | 65                                  | 5          |
| 7   | Co <sub>2</sub> (Hpycz) <sub>4</sub> ·4H <sub>2</sub> O | 0.5 M H <sub>2</sub> SO <sub>4</sub> | 223                | 121                                 | 6          |
| 8   | THTA–Co<br>H <sub>3</sub> [Co <sub>3</sub> (tht)(tha)]  | 0.5 M H <sub>2</sub> SO <sub>4</sub> | 283                | 71                                  | 7          |
| 9   | H <sub>3</sub> [Ni <sub>3</sub> (tht)(tha)]             | 0.5 M H <sub>2</sub> SO <sub>4</sub> | 315                | 76                                  | 7          |
| 10  | CoNi-MOF                                                | 1.0 M KOH                            | 265                | 56                                  | 8          |
| 11  | Ni/Co(10:1)-MOFs                                        | 1.0 M KOH                            | 248                | 40.92                               | 9          |
| 12  | Co, 0.3Ni                                               | 1.0 M KOH                            | 330                | 66                                  | 10         |
| 13  | CoNi-MOF/rGO                                            | 1.0 M KOH                            | 318                | 48                                  | 11         |
| 14  | NiCo-UMOFNs                                             | 1.0 M KOH                            | 250                | 42                                  | 12         |
| 15  | CoNi-MOF                                                | 1.0 M KOH                            | 304                | 89.7                                | 13         |
| 16  | 3D Co/Ni-MOFs                                           | 0.5 M H <sub>2</sub> SO <sub>4</sub> | 357                | 107                                 | 14         |
| 17  | Ni/Co(II)<br>MOFs/PPPT                                  | 0.5 M H <sub>2</sub> SO <sub>4</sub> | 369                | 127.1                               | 15         |
| 18  | Ni-Co-Al -MOF                                           | 1.0 M KOH (OER)                      | 220                | 97                                  | This work  |
|     |                                                         | 1.0 M KOH (HER)                      | 174                | 108                                 | This work  |

## References

1. J. Duan, S. Chen, C. Zhao, *Nat. Commun.* 2017, **8**, 15341.
2. L. Wang, Y. Wu, R. Cao, L. Ren, M. Chen, X. Feng, J. Zhou, B. Wang, *ACS Appl. Mater. Interfaces* 2016, **8**, 16736.
3. J. Xing, K. Guo, Z. Zou, M. Cai, J. Du, C. Xu, *Chem. Commun.* 2018, **54**, 7046.
4. X. Ling, F. Du, Y. Zhang, Y. Shen, T. Li, A. Alsaedi, T. Hayat, Y. Zhou, Z. Zou, *RSC Adv.* 2019, **9**, 3558.
5. V. Khrizanforova, R. Shekurov, V. Miluykov, M. Khrizanforov, V. Bon, S. Kaskel, A. Gubaidullin, O. Sinyashin and Y. Budnikova, *Dalton Trans.*, 2020, **49**, 2794–2802.
6. R. Shekurov, V. Khrizanforova, L. Gilmanova, M. Khrizanforov, V. Miluykov, O. Kataeva, Z. Yamaleeva, T. Burganov, T. Gerasimova and A. Khamatgalimov, *Dalton Trans.*, 2019, **48**, 3601–3609.
7. R. Dong, Z. Zheng, D. C. Tranca, J. Zhang, N. Chandrasekhar, S. Liu, X. Zhuang, G. Seifert and X. Feng, *Chem. Eur. J.*, 2017, **23**, 2255–2260.
8. M. Liu, W. Zheng, S. Ran, S. T. Boles, L. Y. S. Lee, *Adv. Mater. Interfaces* 2018, **5**, 1800849.
9. X. Wang, H. Xiao, A. Li, Z. Li, S. Liu, Q. Zhang, Y. Gong, L. Zheng, Y. Zhu, C. Chen, D. Wang, Q. Peng, L. Gu, X. Han, J. Li, Y. Li, *J. Am. Chem. Soc.* 2018, **140**, 15336.
10. Y. Li, Z. Gao, H. Bao, B. Zhang, C. Wu, C. Huang, Z. Zhang, Y. Xie, H. Wang, *J. Energy Chem.* 2020, **53**, 251.
11. X. R. Zheng, Y. H. Cao, D. Y. Liu, M. Cai, J. Ding, X. R. Liu, J. H. Wang, W. B. Hu, C. Zhong, *ACS Appl. Mater. Interfaces* 2019, **11**, 15662.
12. S. L. Zhao, Y. Wang, J. C. Dong, C. T. He, H. J. Yin, P. F. An, K. Zhao, X. F. Zhang, C. Gao, L. J. Zhang, J. W. Lv, J. X. Wang, J. Q. Zhang,

- A. M. Khattak, N. A. Khan, Z. X. Wei, J. Zhang, S. Q. Liu, H. J. Zhao, Z. Y. Tang,  
*Nat. Energy* 2016, **1**, 16184.
13. J. Wu, Z. Yu, Y. Zhang, S. Niu, J. Zhao, S. Li, P. Xu, *Small* 2021, **17**, 2105150.
14. X. Wang, J.-Y. Luo, J.-W. Tian, D.-D. Huang, Y.-P. Wu, S. Li and D.-S. Li, *Inorg. Chem. Commun.*, 2018, **98**, 141–144.
15. J.L. Liu, X.Y. Zhou, L. Qin, Y.Q. Wang, H.J. Zhu, G. Ni, M.L. Ma, Zhang, M.D. *J. Mol. Struct.* 1252, 132184.
